# Supplementary material for: Investigation of Campylobacter concisus gastric epithelial pathogenicity using AGS cells
Source: Front Microbiol. 2024 Jan 11;14:1289549. doi: 10.3389/fmicb.2023.1289549 (PMC10808343; doi:10.3389/fmicb.2023.1289549)
Supplement: Supplementary file 4 [file Table_3.XLSX]

## Sheet: DESEQ p14 DEG list
Supplementart Table 3 List of significantly upregulated and downregulated genes in AGS cells incubated with C. concisus strain P2CDO4 for 4 hours
Gene	Log2 FC	Adjusted P-value	Gene ID	Type of Gene	Description
ATP13A2	7.29686	1.22848e-08	23400	protein-coding	ATPase cation transporting 13A2
STK19_3	7.26235	2.77591e-05	8859	protein-coding	serine/threonine kinase 19
CDC27P10	6.83707	0.046845	102723584	pseudo	cell division cycle 27 pseudogene 10
HSD17B8_2	6.54096	0.000877886	7923	protein-coding	hydroxysteroid 17-beta dehydrogenase 8
MTCH2_1	6.16119	0.00169479	23788	protein-coding	mitochondrial carrier 2
RPS18_1	6.04223	0.000471577	6222	protein-coding	ribosomal protein S18
GTF2H2	4.92951	0.042103	2966	protein-coding	general transcription factor IIH subunit 2
TRIM27_2	4.90277	0.0063714	5987	protein-coding	tripartite motif containing 27
CLPTM1L_1	4.76983	0.0225332	81037	protein-coding	CLPTM1 like
CCT8_1	4.69671	0.015612	10694	protein-coding	chaperonin containing TCP1 subunit 8
POLR3E	4.42649	0.019336	55718	protein-coding	RNA polymerase III subunit E
GSDMD	3.76287	0.0362857	79792	protein-coding	gasdermin D
HSPA1A_3	3.46749	0.0301798	3303	protein-coding	heat shock protein family A (Hsp70) member 1A
TCAF1_1	3.36834	0.00142579	9747	protein-coding	TRPM8 channel associated factor 1
CYFIP1_1	3.25254	0.00050887	23191	protein-coding	cytoplasmic FMR1 interacting protein 1
TC2N_1	3.20599	0.026049	123036	protein-coding	tandem C2 domains, nuclear
MIR3648-2	2.96768	0.000430931	103504731	ncRNA	microRNA 3648-2
CYP1A1	2.71695	9.4994e-55	1543	protein-coding	cytochrome P450 family 1 subfamily A member 1
SEMA7A_1	2.62451	0.0147229	8482	protein-coding	semaphorin 7A (John Milton Hagen blood group)
RNA45SN1_1	2.20689	0.0297956	106631777	rRNA	RNA, 45S pre-ribosomal N1
SNORA53	2.00067	0.000322717	677832	snoRNA	small nucleolar RNA, H/ACA box 53
RNA45SN5	1.86143	0.00967474	100861532	rRNA	RNA, 45S pre-ribosomal N5
HSPA1A_4	1.85064	0.0295611	3303	protein-coding	heat shock protein family A (Hsp70) member 1A
SNORA74B	1.83358	0.0171931	677841	snoRNA	small nucleolar RNA, H/ACA box 74B
HERC2P3_1	1.3667	0.00851001	283755	pseudo	HERC2 pseudogene 3
SNORA23	1.17803	0.0476574	677808	snoRNA	small nucleolar RNA, H/ACA box 23
NBL1	1.16919	0.0200757	4681	protein-coding	NBL1, DAN family BMP antagonist
RNA45SN1	1.15117	5.21707e-05	106631777	rRNA	RNA, 45S pre-ribosomal N1
RNU5A-1	1.06586	0.0290188	26831	snRNA	RNA, U5A small nuclear 1
SNORD3D	1.0002	1.02721e-33	780854	snoRNA	small nucleolar RNA, C/D box 3D
TJP1_2	-2.20246	0.00124022	7082	protein-coding	tight junction protein 1
RFX1_1	-2.30756	0.0260436	5989	protein-coding	regulatory factor X1
NAPEPLD	-2.60353	0.00050887	222236	protein-coding	N-acyl phosphatidylethanolamine phospholipase D
HLA-A_4	-2.68104	0.047947	3105	protein-coding	major histocompatibility complex, class I, A
PRPF8_1	-3.14988	0.0391722	10594	protein-coding	pre-mRNA processing factor 8
FBXO42_1	-4.21363	0.0204964	54455	protein-coding	F-box protein 42
HSF1_1	-5.06712	1.76837e-09	3297	protein-coding	heat shock transcription factor 1
ALOX5	-5.17231	0.0486907	240	protein-coding	arachidonate 5-lipoxygenase
METTL9	-5.49264	0.0150733	51108	protein-coding	methyltransferase like 9
IFI27L1	-5.88569	0.00848364	122509	protein-coding	interferon alpha inducible protein 27 like 1
